# Supplementary material for: Impact of Comorbidity on Mortality in COVID-19 Patients: A Single- Center Retrospective Study
Source: Research Square preprint supplement (doi:10.21203/rs.3.rs-4161548/v1), 2024-04-02
Supplement: Supplementary file 1 [file 6a6fb51b100f9e9fee0227ce.docx]

**Table (1):** Characteristics of COVID-19 patients in KLE hospital, Belagavi, India (2020-2021) *

| **Characteristics** | ***n*** | **(*%*)** |
| --- | --- | --- |
| **Gender** | | |
| Male | 444 | **(69.2)** |
| Female | 198 | **(30.8)** |
| **Age** (years) | | |
| < 53 | 309 | **(48.1)** |
| ≥ 53 | 333 | **(51.9)** |
| Median (IQR) : 54 (24) | | |
| Range: 6– 97 | | |
| **Stay in Hospital** (day) | | |
| ≤ 6 | 326 | **(50.8)** |
| >7 | 316 | **(49.2)** |
| Median (IQR): 6 (6) |  |  |
| Range: 0– 92 |  |  |
| **Sign and symptoms** | | |
| Cough | 76 | **(11.8)** |
| Fever | 304 | **(47.4)** |
| Dyspnea | 335 | **(52.2)** |
| Vomiting | 20 | **(3.1)** |
| Diarrhea | 9 | **(1.4)** |
| Headache | 23 | **(3.6)** |
| Loss of appetite | 24 | **(3.7)** |
| Chest pain | 25 | **(3.9)** |
| Myalgia | 22 | **(3.4)** |
| Neurological disorder | 187 | **(29.1)** |
| **Co morbidities** |  |  |
| Yes | 256 | **(39.9)** |
| No | 386 | **(60.1)** |
| **Co morbidities types** | | |
| Hypertension | 197 | **(30.7)** |
| Diabetes Mellitus | 187 | **(29.1)** |
| Kidney disease | 23 | **(3.6)** |
| Thyroid disorder | 14 | **(2.2)** |
| Cardiac disease | 51 | **(7.9)** |
| Pulmonary disease | 18 | **(2.8)** |
| Liver disease | 12 | **(1.9)** |
| Hematological disorder | 3 | **(0.5)** |
| **Comorbidity count** |  |  |
| Mono morbidity | 94 | **(36.7)** |
| Poly morbidity | 161 | **(62.8)** |
| **Vital Sign:** Median (IQR) & (Rang) | | |
| Temperature (°F) | 98.4 (0.60), (92.9-101) | |
| Systolic blood pressure (mm Hg) | 120 (20.0), (70-250) | |
| Diastolic blood pressure (mm Hg) | 80 (10.0), (40-130) | |
| Pulse rate (BPM) | 88 (20.0), (36-180) | |
| Respiratory rate (berth per minute) | 24 (4.5),(18-56) | |
| SPO2 (%) | 95 (7.0) , (30-100) | |
| **Blood glucose (**mg/dl) | 144.5(123.5) ,(36-644) | |
| **COVID-19 outcomes** | | |
| Survived | 495 | **(77.1)** |
| Decease | 147 | **(22.9)** |

The totalnumber of COVID-19 patients enrolled in the study was 642; IQR, interquartile range, mm Hg: millimetres of mercury, BPM: beats per minute, F: Fahrenheit, BPM: Breath per minute, mg/dl: milligram/ decilitre

**Table (2):** Demographic and clinical characteristics of deceased COVID-19 patients in KLE Hospital, Belagavi, India (2020-2021) *

| **COVID-19 outcome (Deceased)** | | | | | | | **Risk factor** |
| --- | --- | --- | --- | --- | --- | --- | --- |
| ***P*-value** | **95% CI** | **OR** | **(%)** | ***n*** | | **N** |
| 0.635 | (0.606-1.357) | **Gender** | | | | | |
| 0.907 | (23.4) | | 104 | 444 | Male |
|  | (45.3) | | 43 | 198 | Female |
|  |  |  | **Age** (years) | | | | |
| 0.000 | (1.450-3.126) | 2.129 | (16.2) | | 50 | 309 | <53 |
|  | (29.1) | | 97 | 333 | ≥53 |
| **Stay in hospital (**day) | | | | | | | |
| 0.947 | (0.683–1.427) | 0.988 | (23.0) | | 75 | 326 | ≤ 6 |
|  | (22.8) | | 72 | 316 | >7 |
|  |  |  |  | |  |  | **Sign and symptoms** |
| 0.485 | (0.445-1.470) | 0.808 | (19.7) | | 15 | 76 | Cough |
| 0.793 | (0.727-1.519) | 1.050 | (23.4) | | 71 | 304 | Fever |
| 0.000 | (1.657-3.620) | 2.449 | (30.1) | | 101 | 335 | Dyspnea |
| 0.589 | (0.169-2.027) | 0.586 | (15.0) | | 3 | 20 | Vomiting |
| 0.222 | (0.736-0.801) | 0.768 | (0.0) | | 0 | 9 | Diarrhea |
| 0.622 | (0.235-2.093) | 0.701 | (17.4) | | 4 | 23 | Headache |
| 1.000 | (0.324-2.405) | 0.882 | (20.8) | | 5 | 24 | Loss of appetite |
| 0.813 | (0.418-2.721) | 1.066 | (24.0) | | 6 | 25 | Chest pain |
| 1.000 | (0.359-2.731) | 0.990 | (22.7) | | 5 | 22 | Myalgia |
| 0.030 | (0.395-0.943) | 0.610 | (17.1) | | 32 | 187 | Neurological disorder |

**Table (3):** Demographics and clinical characteristics of COVID-19 patients with co morbidity count in KLE hospital, Belagavi, India (2020-2021) *

| **Variables** | **Co-morbidly**  **N=256** | |
| --- | --- | --- |
| **Mono morbidity** | **Poly morbidity** |
| **Subject n** | 94 (36.7) | 161 (62.9) |
| Age | 56.2± 15.9 | 62.2 ±13.1 |
| **Sex** | | |
| Male | 60 (63.9) | 110 (68.3) |
| Female | 37 (39.4) | 48 (29.9) |
| **Sign and symptoms** | | |
| Cough | 5 (5.3) | 29 (18.0) |
| Fever | 40 (42.6) | 59 (36.7) |
| dyspnea | 44 (46.8) | 72 (44.7) |
| Vomiting | 5 (5.3) | 4 (2.4) |
| Diarrhea | 1 (1.0) | 2 (1.2) |
| Headache | 5 (5.3) | 5 (3.1) |
| Loss of appetite | 3 (3.1) | 8 (4.9) |
| Chest pain | 3 (3.1) | 11 (6.8) |
| Myalgia | 2 (2.1) | 2 (1.2) |
| Neurological disorder | 29 (30.9) | 45 (27.9) |
| **Co-morbidities** | | |
| Hypertension | 37 (39.3) | 138 (85.7) |
| Diabetes Mellitus | 47 (50.0) | 135 (83.8) |
| Kidney disease | 7 (7.4) | 15 (9.3) |
| Thyroid | 2 (2.1) | 12 (7.4) |
| Cardiac disease | 8 (8.5) | 41 (25.4) |
| Pulmonary disease | 3 (3.1) | 15 (9.3) |
| Hematological disorder | 2 (8.5) | 0 (0.0) |
| Liver disease | 3 (3.1) | 6 (3.7) |
| **COVID-19 outcomes** | | |
| Survived | 73 (77.7) | 105 (65.2) |
| Decease | 24 (25.6) | 53 (32.9) |
| **Stay in hospital** | 8.3 ±9.9 | 6.8 ±5.8 |
| **Systolic blood pressure** | 122.9 ±22.6 | 126 ±20.2 |
| **Diastolic blood pressure** | 75.9 ±12.5 | 78.0 ±11.9 |
| **Temperature** | 98.1 ±1.0 | 98.2 ± 1.2 |
| **Pulse rate** | 88.3 ±19.4 | 91.3 ±18.9 |
| **Raspatory rate** | 23.6 ±2.9 | 23.4 ±2.8 |
| **SpO2** | 90.9 ±11.4 | 92.1 ±9.0 |
| **Blood glucose** | 200 ±117.0 | 203.4 ±112.3 |

**Table (4):** Association of co morbidities and COVID-19 mortality among COVID-19 patients in KLE hospital, Belagavi, India (2020-2021) *

| **COVID-19 outcomes (**Deceased) | | | | | | | **Co- morbidity** |
| --- | --- | --- | --- | --- | --- | --- | --- |
| **p-value** | **95% CI** | **OR** | **(%)** | | **n** | **N** |
| **Hypertension** | | | | | | | |
| 0.550 | 1.157 (0.716-1.870) | | **(29.4)** | 58 | | 197 | Yes |
| **(20.0)** | 89 | | 445 | No |
| **Diabetes Mellitus** | | | | | | | |
| 0.011 | (1.148-2.988) | 1.852 | **(32.6)** | 61 | | 187 | Yes |
| **(18.9)** | 86 | | 455 | No |
|  | | | | | | | **Kidney disease** |
| 0.000 | (2.613-16.124) | 6.491 | **(65.2)** | 15 | | 23 | Yes |
| **(21.3)** | 132 | | 619 | No |
| 0.590 | (0.173-2.713) | 0.685 |  | | | | **Thyroid disorder** |
| **(21.4)** | 3 | | 14 | Yes |
| **(22.9)** | 144 | | 628 | No |
| 0.340 | (0.337-1.455) | 0.700 |  |  | |  | **Cardiac disease** |
| **(23.5)** | 12 | | 51 | Yes |
| **(22.8)** | 135 | | 591 | No |
|  |  |  |  |  | |  | **Pulmonary** |
| 0.301 | (0.611-4.910) | 1.732 | **(33.3)** | 6 | | 18 | Yes |
| **(22.6)** | 141 | | 624 | No |
|  | | | | | | | **Liver disease** |
| 0.604 | (0.145-3.088) | 0.699 | **(16.7)** | 2 | | 12 | Yes |
| **(23.0)** | 145 | | 630 | No |
|  | | | | | | | **Hematological disorder** |
| 1.000 | (0.738-0.803) | 0.770 | **(0.0)** | 0 | | 3 | Yes |
| **(23.0)** | 147 | | 639 | No |
